# Supplementary material for: Muslim Bengal writes back: A study of Rokeya’s representation of Europe
Source: MDPI journal article supplement (doi:10.3390/diagnostics12092248), 2012-01-01
Supplement: s1 [file s1]

Supplementary materials

Supplementary Table S1 Twelve cases of probable donor derived infections

| Recipients | Age/Gender | Pathogens in preservation fluid                                                              | Pathogens of P-DDIs                                        | Graft site | Blood circulation | Surgical wound | Urinary tract | Other sites |
|------------|------------|----------------------------------------------------------------------------------------------|------------------------------------------------------------|------------|-------------------|----------------|---------------|-------------|
| 1          | 37/M       | <i>Enterococcus faecium</i> , <i>Enterococcus faecalis</i> ,<br><i>Klebsiella pneumoniae</i> | <i>Enterococcus faecium</i>                                | Yes        | Yes               | No             | No            | No          |
| 2          | 9/M        | <i>Staphylococcus aureus</i>                                                                 | <i>Staphylococcus aureus</i>                               | Yes        | Yes               | Yes            | Yes           | No          |
| 3          | 43/F       | <i>Enterococcus faecium</i> , <i>Klebsiella pneumoniae</i>                                   | <i>Enterococcus faecium</i>                                | Yes        | Yes               | Yes            | No            | No          |
| 4          | 49/F       | <i>Acinetobacter baumannii</i>                                                               | <i>Acinetobacter baumannii</i>                             | Yes        | No                | Yes            | Yes           | No          |
| 5          | 59/M       | <i>Cyberlindnera jadinii</i>                                                                 | <i>Cyberlindnera jadinii</i>                               | No         | Yes               | No             | No            | No          |
| 6          | 40/M       | <i>Enterococcus faecalis</i>                                                                 | <i>Enterococcus faecalis</i>                               | Yes        | No                | No             | No            | No          |
| 7          | 50/F       | <i>Enterococcus faecium</i> , <i>Leuconostoc lactis</i>                                      | <i>Enterococcus faecium</i>                                | Yes        | No                | No             | No            | No          |
| 8          | 55/M       | <i>Enterococcus faecium</i> , <i>Klebsiella pneumoniae</i>                                   | <i>Enterococcus faecium</i> , <i>Klebsiella pneumoniae</i> | Yes        | Yes               | Yes            | Yes           | No          |
| 9          | 35/F       | <i>Klebsiella pneumoniae</i>                                                                 | <i>Klebsiella pneumoniae</i>                               | Yes        | No                | No             | No            | No          |
| 10         | 36/M       | <i>Acinetobacter baumannii</i>                                                               | <i>Acinetobacter baumannii</i>                             | Yes        | No                | No             | No            | No          |
| 11         | 59/M       | <i>Stenotrophomonas maltophilia</i>                                                          | <i>Stenotrophomonas maltophilia</i>                        | No         | No                | No             | No            | Pulmonary   |
| 12         | 57/M       | <i>Candida albicans</i> , <i>Enterococcus faecium</i> ,<br><i>Enterococcus faecalis</i>      | <i>Candida albicans</i> , <i>Enterococcus faecium</i>      | Yes        | No                | No             | No            | No          |

Supplementary Table S2 Impact of different pathogens in preservation fluid on infection-related events

| Infection-related events | Other pathogens<br>(n=173) |      | ESKAPE (n=124) |       | P-value <sup>a</sup> | <i>Candida</i> (n=32) |       | P-value <sup>b</sup> | ESKAPE or <i>Candida</i><br>(n=156) |       | P-value <sup>c</sup> |
|--------------------------|----------------------------|------|----------------|-------|----------------------|-----------------------|-------|----------------------|-------------------------------------|-------|----------------------|
| Bloodstream infection    | 12                         | 6.9% | 18             | 14.5% | 0.198                | 4                     | 12.5% | 1.000                | 22                                  | 14.1% | 0.033                |
| Wound infection          | 3                          | 1.7% | 6              | 4.8%  | 1.000                | 0                     | 0.0%  | 1.000                | 6                                   | 3.8%  | 0.317                |
| Graft-site infection     | 6                          | 3.5% | 20             | 16.1% | 0.000                | 6                     | 18.8% | 0.030                | 26                                  | 16.7% | <0.01                |
| Urinary tract infection  | 10                         | 5.8% | 8              | 8.9%  | 1.000                | 3                     | 9.4%  | 1.000                | 11                                  | 7.1%  | 0.638                |
| P-DDIs                   | 2                          | 1.2% | 9              | 7.3%  | 0.090                | 1                     | 3.1%  | 1.000                | 10                                  | 6.4%  | 0.011                |

<sup>a</sup> Comparison between recipients with ESKAPE pathogens in preservation fluid and recipients with other pathogens in preservation fluid.

<sup>b</sup> Comparison between recipients with *Candida* species in preservation fluid and recipients with other pathogens in preservation fluid.

<sup>c</sup> Comparison between recipients with ESKAPE or *Candida* pathogens in preservation fluid and recipients with other pathogens in preservation fluid.

P-values are corrected by Bonferroni.

Supplementary Table S3 Impact of different groups in preservation fluid on probable donor-derived events

| P-DDIs            | Other pathogens (n=173) |      | ESKAPE (n=124) |      | P-value <sup>a</sup> | <i>Candida</i> (n=32) |      | P-value <sup>b</sup> | ESKAPE or <i>Candida</i> (n=156) |      | P-value <sup>c</sup> |
|-------------------|-------------------------|------|----------------|------|----------------------|-----------------------|------|----------------------|----------------------------------|------|----------------------|
| Blood circulation | 0                       | 0.0% | 4              | 3.2% | 0.180                | 1                     | 3.1% | 1.000                | 5                                | 3.2% | 0.023                |
| Surgical wound    | 0                       | 0.0% | 4              | 3.2% | 0.180                | -                     | -    | -                    | 4                                | 2.6% | 0.050                |
| Graft-site        | 1                       | 0.6% | 9              | 7.3% | 0.030                | 0                     | 0.0% | 1.000                | 9                                | 5.8% | 0.016                |
| Urinary tract     | 0                       | 0.0% | 4              | 3.2% | 0.180                | -                     | -    | -                    | 4                                | 2.6% | 0.050                |

<sup>a</sup> Comparison between recipients with ESKAPE pathogens in preservation fluid and recipients with other pathogens in preservation fluid.

<sup>b</sup> Comparison between recipients with *Candida* species in preservation fluid and recipients with other pathogens in preservation fluid.

<sup>c</sup> Comparison between recipients with ESKAPE or *Candida* pathogens in preservation fluid and recipients with other pathogens in preservation fluid.

P-values are corrected by Bonferroni.
